# Supplementary material for: Hybrid amphiphilic bimodal hydrogels having mechanical and biological recognition characteristics for cardiac tissue engineering
Source: Royal Society of Chemistry journal article supplement (doi:10.1039/c5ra04448k), 2015-01-01
Supplement: c5ra04448k1.pdf [file c5ra04448k1.pdf]

## Supplementary information

### Video 1

#### **Title: 3D growth of L929 cells on MFSA-DEGDMA hydrogels.**

**Video 1:** Laser scanning confocal microscopy Z-stacking evaluations for the infiltration of FDA stained L929 fibroblast cells towards the interstices of the MFSA-DEGDMA hydrogels showing the cells residing at different planes. The video was captured with two frames/second using glow scale color palette. The maximum infiltration was found to be 52 $\mu$ m from the surface.

### Video 2

#### **Title: 3D growth of L929 cells on MFSA-PEGDA hydrogels.**

**Video 2:** Laser scanning confocal microscopy Z-stacking evaluations for the infiltration of FDA stained L929 fibroblast cells towards the interstices of the MFSA-PEGDA hydrogels showing the cells residing at different planes. The video was captured with two frames/second using glow scale color palette. The maximum infiltration was found to be 98 $\mu$ m from the surface.

**Key words:** hydrogels, cell infiltration, 3D growth of cells, Laser scanning confocal microscopy, Z-stacking.
